# Supplementary material for: Enhanced Interferon-β Response Contributes to Eosinophilic Chronic Rhinosinusitis
Source: Front Immunol. 2018 Oct 16;9:2330. doi: 10.3389/fimmu.2018.02330 (PMC6232691; doi:10.3389/fimmu.2018.02330)
Supplement: Supplementary file 1 [file Data_Sheet_1.pdf]

## **Online Supplementary Information**

### **Enhanced interferon- $\beta$ response contributes to eosinophilic chronic rhinosinusitis**

Yong Ju Jang,<sup>1</sup> Ji Youn Lim,<sup>1</sup> Seoyeon Kim,<sup>1</sup> Yoo La Lee,<sup>1</sup> Mi-Na Kweon,<sup>2</sup> Ji Heui Kim<sup>1\*</sup>

**Corresponding author:** Ji Heui Kim (jhkim0217@amc.seoul.kr)

## **Data S1. Supporting Methods**

### **Real-time PCR for type I IFN in human tissue**

Total RNA was extracted from 45 µL of tissue sample with the RNeasy mini kit (Qiagen GmbH, Hilden, Germany) according to the manufacturer's instructions. cDNA was synthesized using M-MuLV reverse transcriptase (RT-&GO™ kit; MP Biomedicals, Santa Ana, CA) according to the manufacturer's protocol. Quantitative real-time PCR was performed using each cDNA with the Light-Cycler 480 SYBR Green I Master (Roche, Mannheim, Germany). PCR primer sets used for the detection of glyceraldehyde-3-phosphate dehydrogenase (GAPDH), *IFNA* and *IFNB* are listed in Table E1. The reaction mixture was prepared by the addition of a primer set to a LightCycler® real-time PCR system following the manufacturer's instructions. Reaction conditions were as follows: initial denaturation at 95°C for 3 min, followed by 40 cycles of denaturation at 95°C for 20 s, annealing at 55°C for 20 s, and extension at 72°C for 20 s. Melting temperature analysis was also performed (60–95°C at 0.5°C increments for reading the fluorescent signals). To analyze the data, we used LightCycler® 480 software, Version 1.5 (Roche). The results were normalized to GAPDH expression, and the relative gene expression was calculated using the comparative  $2^{-\Delta \Delta CT}$  method.

### **Human tissue homogenates**

Fresh tissue was weighed and homogenized with 1 mL of a mixture containing Protease Inhibitor Cocktail (Roche), 1 mM EDTA, 10 mM Tris-HCl, 0.05% sodium azide, and 1% Tween80 (Sigma-Aldrich, St Louis, MO) per 100 mg of tissue. The homogenates were

centrifuged at 11,000 g for 10 min at 4°C; the supernatant was collected and stored at –80°C until analysis.

### **Nasal polyp stromal cell culture**

NP stromal cells were isolated from NP tissue as described previously (E1). In brief, NP tissue samples were washed with PBS containing 10,000 U/mL penicillin, 10,000 µg/mL streptomycin, and 25 µg/mL amphotericin B. Chopped tissues were plated in 100-mm culture dishes (Corning, Corning, NY), and cultured in Dulbecco's modified Eagle's medium/nutrient mixture F-12 (DMEM/F12; Gibco, Grand Island, NY), supplemented with 10% (v/v) fetal bovine serum (Gibco), at 37°C in fully humidified air containing 5% (v/v) CO<sub>2</sub>. After purification of single NP stromal cells, the attached fibroblast-like cells were cultured for 7 days.

### **Western blot analysis**

After lysing NP stromal cells, protein samples (15 µg/lane) were resolved by electrophoresis on 7.5% sodium dodecylsulfate (SDS)-polyacrylamide gels and then transferred to nitrocellulose membranes. Membranes were incubated in blocking buffer and then incubated with one or more of the following primary antibodies: anti-STAT1(catalog no. 9172; Cell Signalling, 1:1000), anti-phospho STAT1 (catalog no. 7649; Cell Signalling, 1:1000), anti-STAT2(Cell Signalling, 1:1000), anti-phospho STAT2 (catalog no. 07-224; Upstate, 1:500) and anti-β-actin(Santa cruz, 1:5000). After incubating with primary antibodies, membranes were washed and incubated with horseradish peroxidase-conjugated secondary antibodies (Santa cruz). Immunoreactive bands were visualized by enhanced chemiluminescence (PerkinElmer Life Sciences, Boston, MA) and normalized to relative to β-actin expression of

the same samples.

## REFERENCES

- E1. Kim JH, Kwon HJ, Jang YJ. Levocetirizine inhibits rhinovirus-induced up-regulation of fibrogenic and angiogenic factors in nasal polyp fibroblasts. *Am J Rhinol Allergy* (2011) 25:416-20.

## Online Supplement Table and Figures

**TABLE E1.** Primers used for quantitative real-time PCR analysis

| Primer       | Sequence                 | Expected<br>product size (bp) | Melting<br>temperature (°C) |
|--------------|--------------------------|-------------------------------|-----------------------------|
| <i>IFNA</i>  | S GAAATACTTCCAAAGAATCAC  | 90                            | 78.4                        |
|              | A GATCTCATGATTTCTGCTCT   |                               |                             |
| <i>IFNB</i>  | S AGCTGCAGCAGTTCCAGAAG   | 110                           | 85.3                        |
|              | A GTCTCATTCCAGCCAGTGC    |                               |                             |
| <i>IRF3</i>  | S AGAGGCTCGTGATGGTCAAG   | 159                           | 80.5                        |
|              | A GCAGGTAGGCCTTGTACTGG   |                               |                             |
| <i>IRF7</i>  | S TACCATCTACCTGGGCTTCG   | 146                           | 90.4                        |
|              | A TGCTGCTATCCAGGGAAGAC   |                               |                             |
| <i>IRF9</i>  | S CCCGAAAAC TCCGGA ACTG  | 64                            | 82.8                        |
|              | A CAGCACACTCCGGGAACT     |                               |                             |
| <i>STAT1</i> | S CTAGTGGAGTGGAAGCGGAG   | 252                           | 79.0                        |
|              | A CACCACAAACGAGCTCTGAA   |                               |                             |
| <i>STAT2</i> | S CAGGCTCATTGTGGTCTCTAAT | 101                           | 83.0                        |
|              | A GCCCTAGTTCCAGCTCTAATG  |                               |                             |

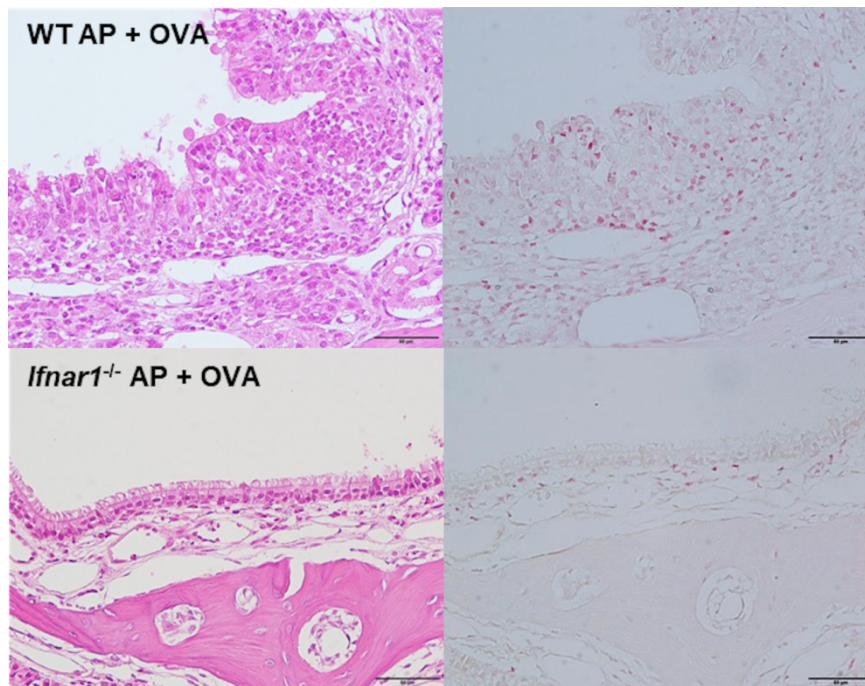

**Figure E1.** Polypoid lesions and severe eosinophilic inflammation developed in wild-type eosinophilic chronic rhinosinusitis mice intranasally treated with the protease from *Aspergillus oryzae* (AP) and ovalbumin (OVA) for 12 weeks, but this manifestation was not distinct in *Ifnar1*<sup>-/-</sup> AP and OVA challenged mice (magnification,  $\times 400$ ; scale bar, 50  $\mu\text{m}$ ).

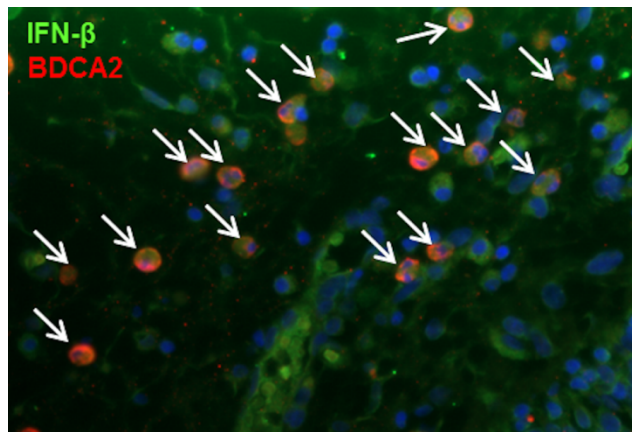

**Figure E2.** Immunofluorescence assay was performed with anti-IFN- $\beta$  (green fluorescence), anti-BDCA2 (red fluorescence) for pDC, and DAPI (blue fluorescence) for nuclei (magnification,  $\times 400$ ). BDCA2<sup>+</sup> cells (white arrow) were about 50% of IFN- $\beta$ <sup>+</sup> cells.
